# Supplementary material for: Distinct Roles of Honeybee Gut Bacteria on Host Metabolism and Neurological Processes
Source: PubMed Central journal article supplement (PMC9045319; doi:10.1128/spectrum.02438-21), 2022-03-10
Supplement: spectrum02438-21_supp_1_seq10.pdf [file spectrum02438-21_supp_1_seq10.pdf]

## Supplemental Material

For: **Distinct roles of honeybee gut bacteria on host metabolism and neurological process**

Zijing Zhang, Xiaohuan Mu, Yao Shi, Hao Zheng,

| <b>Contents</b> | <b>Page</b> |
|-----------------|-------------|
| Figure S1       | 2           |
| Figure S2       | 3           |
| Figure S3       | 4           |
| Figure S4       | 5           |
| Table S1        | 6           |
| Table S2        | 6           |
| Table S3        | 6           |
| Table S4        | 6           |

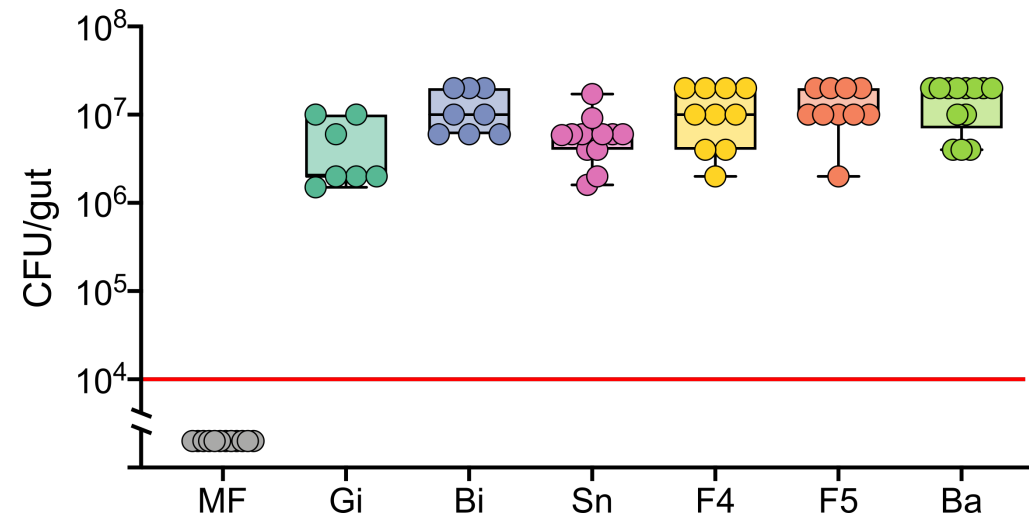

**FIG S1** Boxplots of the total CFU per gut estimated by bacteria culture for MF and mono-colonized bees.

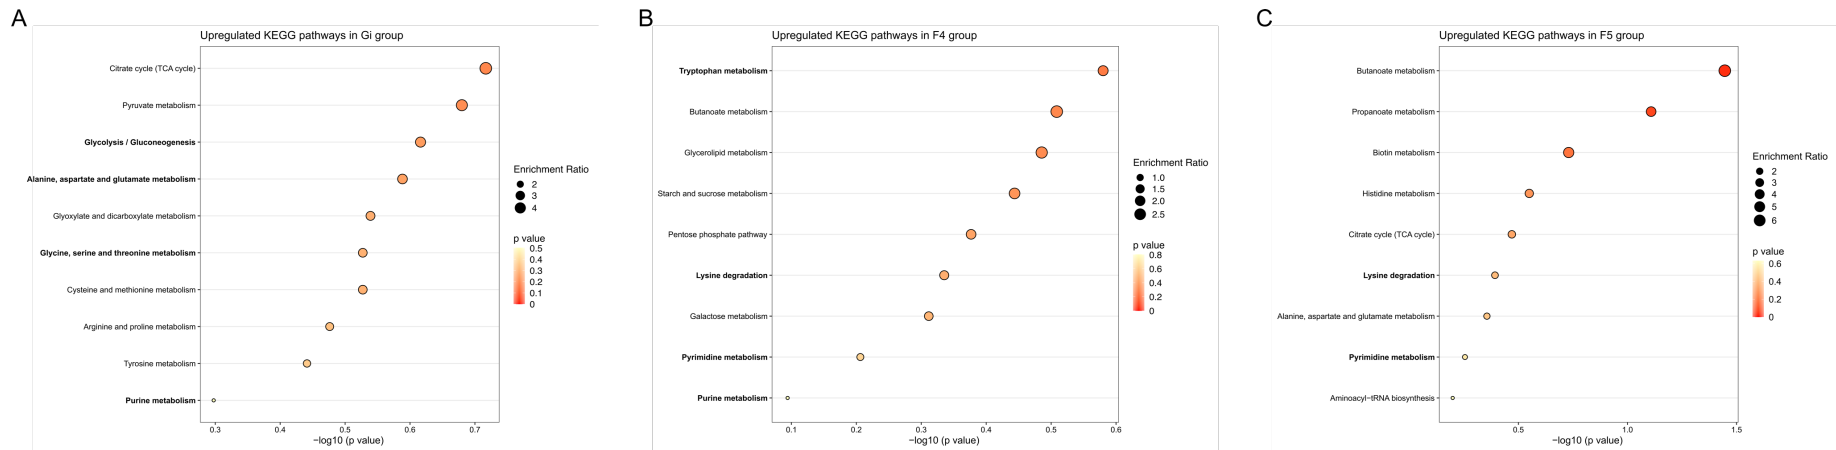

**FIG S2** The most significantly enriched KEGG pathways upregulated in the gut of (A) *Gilliamella*, (B) *Lactobacillus* Firm4, and (C) *Lactobacillus* Firm5 inoculated bees



A

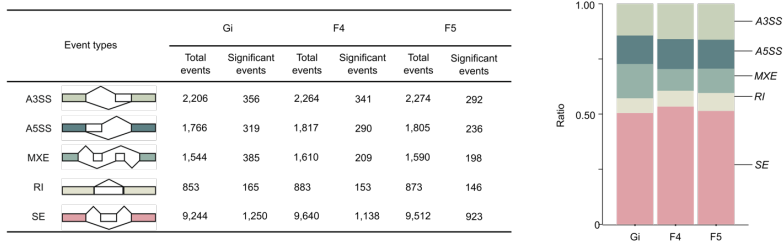

B

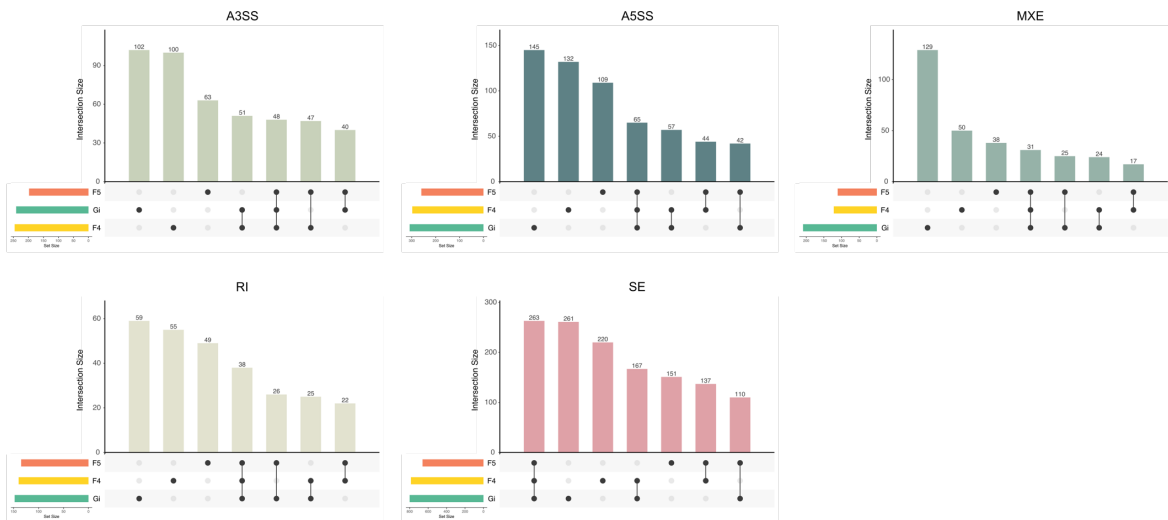

**FIG S4** Gut microbiota impacts spliced genes in the honeybee brain. (A) Numbers of the differential alternative splicing events in the brains of bacteria-colonized bees compared to MF bees. Stacked column graph shows the relative abundance of different types of alternative splicing events in each group. A3SS, alternative 3' splice site; A5SS, alternative 5' splice site; MXE, mutually exclusive exon; RI, retained introns; SE, skipped exon. (B) UpSet plots showing the intersections of alternative splicing (AS) events associated with different bacteria-colonized groups. The dots and lines on the bottom right represent which intersection is shown by the bar plots above. The size of intersections is given above the bar plot. The total amount of different types of events for each bee group is given to the left of the intersection diagram.

**Table S1 (separate file).** Raw data of all metabolites abundance in the hemolymph of microbiota-free and bacteria-colonized bees.

**Table S2 (separate file).** Hemolymph metabolomic WGCNA module analysis of microbiota-free and bacteria-colonized bees.

**Table S3 (separate file).** Normalized gene expression levels in brains of microbiota-free and bacteria-colonized bees.

**Table S4 (separate file).** Alternative splicing events in brains of microbiota-free and bacteria-colonized bees.
